# Supplementary material for: Amphiphilic-like carbon dots as antitumoral drug vehicles and phototherapeutical agents
Source: Royal Society of Chemistry journal article supplement (doi:10.1039/d1qm00855b), 2021-01-01
Supplement: d1qm00855b1.pdf [file d1qm00855b1.pdf]

## Supporting information for

### **Amphiphilic-like carbon dots as antitumoral drug vehicles and phototherapeutical agents**

Mariano Ortega-Muñoz<sup>a</sup>, Paula Vargas-Navarro<sup>a</sup>, Simona Plesselova<sup>b</sup>, M. Dolores Giron-Gonzalez<sup>b</sup>, Guillermo R. Iglesias<sup>c</sup>, Rafael Salto-Gonzalez<sup>b</sup>, Fernando Hernandez-Mateo<sup>a</sup>, Angel V. Delgado<sup>c</sup>, F. Javier Lopez-Jaramillo<sup>\*a</sup> and Francisco Santoyo-Gonzalez<sup>\*a</sup>

<sup>a</sup>Department of Organic Chemistry, Biotechnology Institute, School of Sciences, Campus Fuentenueva sn, University of Granada, 18071-Granada, Spain.

<sup>b</sup>Department of Biochemistry and Molecular Biology II, School of Pharmacy, Campus Cartuja 18071-Granada, University of Granada, Spain

<sup>c</sup>Department of Applied Physics, School of Sciences, Campus Fuentenueva sn, University of Granada, 18071-Granada, Spain

\*Corresponding authors:

F. Javier Lopez-Jaramillo, [fjljara@ugr.es](mailto:fjljara@ugr.es)

Francisco Santoyo-Gonzalez, [fsantoyo@ugr.es](mailto:fsantoyo@ugr.es)

## Table of Contents

|                                                                                       |                |
|---------------------------------------------------------------------------------------|----------------|
| <b>1. Experimental procedures</b>                                                     | <b>p. S-3</b>  |
| Chemicals and Materials                                                               |                |
| Cell cultures                                                                         |                |
| Instrumentation                                                                       |                |
| Determination of the octanol-water partition coefficient                              |                |
| Formation of inclusion complexes with camptothecin                                    |                |
| Formation of inclusion complexes with IR780                                           |                |
| Cell viability using Flow cytometry                                                   |                |
| Electrophoretic mobility and Z-potential determination                                |                |
| <br>                                                                                  |                |
| <b>2. Figures</b>                                                                     | <b>p. S-6</b>  |
| <b>Fig. S1.-</b> XPS spectra of <b>CD-1Na</b> .                                       |                |
| <b>Fig S2.-</b> HRTEM and UV–Vis and photoluminescence spectra of <b>CD-1Na</b> .     |                |
| <b>Fig. S3.-</b> Cytotoxicity of <b>LCD-1Na</b> , <b>LCD1-Na</b> on HEK 239 cells.    |                |
| <b>Fig. S4.-</b> Length of the alkyl chains of LCDs, CPT and IR-780.                  |                |
| <b>Fig. S5.-</b> Cytotoxicity of <b>LCD1-Na@CPT</b> and <b>CPT</b> on HEK 239 cells.  |                |
| <b>Fig S67.-</b> Flow cytometry analysis of <b>LCD-2Na@CPT</b> and CPT on G361 cells. |                |
| <b>Fig S7.-</b> Normalized UV-vis spectra of <b>LCD-2Na@IR780</b> .                   |                |
| <b>Fig S8.-</b> Photothermal experiment on a drop.                                    |                |
| <br>                                                                                  |                |
| <b>3. Tables</b>                                                                      | <b>p. S-14</b> |
| <b>Table S1.-</b> Elemental analysis by XPS                                           |                |
| <b>Table S2.-</b> Fluorescent quantum yield                                           |                |
| <b>Table S3.-</b> Electrophoretic mobility and Z-potential                            |                |

## 1. Experimental procedures

### Chemical and materials

Anhydrous citric acid (CA), anhydrous dimethyl sulfoxide (DMSO), hexan-1-amine, octadecan-1-amine, 1-octanol and dialysis membranes (14 000 Da cut-off) were obtained from Sigma-Aldrich (St Louis, MO, USA), 2-[2-[2-Chloro-3-[(1,3-dihydro-3,3-dimethyl-1-propyl-2H-indol-2-ylidene)ethylidene]-1-cyclohexen-1-yl]ethenyl]-3,3-dimethyl-1-propylindolium iodide (IR780) from Alfa Aesar (Kander, Germany) and 2-[2-[2-Chloro-3-[2-[1,3-dihydro-3,3-dimethyl-1-(4-sulfobutyl)-2H-indol-2-ylidene]-ethylidene]-1-cyclohexen-1-yl]-ethenyl]-3,3-dimethyl-1-(4-sulfobutyl)-3H-indolium hydroxide, inner salt, sodium salt (IR783) from Carbosynth (Berkshire, England, U.K.). Commercial reagents were used as received without further purification.

### Cell cultures

Chinese hamster ovary (CHO-k1; ATCC n° CCL-61), mouse colon carcinoma (CT26.WT; ATCC n° CRL-2638), human skin malignant melanoma (G361; ATCC n° CRL-1424), human embryonic kidney (HEK-293; ATCC n° CRL-15739), human cervix adenocarcinoma (HeLa; ATCC n° CCL-2), human breast adenocarcinoma (MDA-MB-231; ATCC n° HTB-26), mouse neuroblast cells (Neuro-2a; ATCC n° CCL-131) and human breast adenocarcinoma (SK-BR-3; ATCC n° HTB-30) were provide by the Cell Culture Facility from Universidad de Granada. Cells were grown in Dulbecco's Modified Eagle Medium (DMEM) supplemented with 10% (v/v) fetal bovine serum (FSB), 2 mM glutamine plus 100 U/mL penicillin, and 0.1 mg/mL streptomycin. Cells were seeded in 48 well plates at a density of  $1.5 \times 10^4$  cells per well and incubated at 37 °C for 24 h to reach a cell confluence of 80–90%.

### Instrumentation

Fourier transform infrared (FTIR) spectra were collected using a PerkinElmer FT-IR Spectrum Two spectrometer. Electron microscopy analysis was carried out at Centro de Instrumentacion Cientifica, Universidad de Granada, using a high-resolution transmission electron microscope (HRTEM) (FEI TITAN G2) operated at 300 kV. X-ray photoelectron spectroscopy (XPS) analyses were carried out at Centro de Instrumentacion Cientifica, Universidad de Granada, with a Kratos Axis Ultra-DLD spectrometer using monochromatic Al K $\alpha$  radiation. UV/Vis absorption spectra were collected using a Specord 200 Plus instrument (Analytik Jena). Photoluminescence spectra were conducted on F2000 fluorescence spectrophotometer (Hitachi).

### Determination of the octanol-water partition coefficient (K<sub>ow</sub>)

A volume of 1 mL of different solutions in water of the the salt form of LCDs at concentrations of 1, 0.9, 0.8, 0.7, 0.6, 0.5, 0.4, 0.3, 0.2 mg/mL was extracted with 1 mL of 1-octanol. In order to calculate K<sub>ow</sub> of the acidic form of LCDs they were obtained from the sodium salts by acidification with two drops of 5% HCl. After 1 h of shaking, phase separation was allowed to proceed for 5.5 h and the concentration of CDs in the aqueous phase was determined by interpolation of the fluorescence at 454 nm (Ex 326 nm) of the aqueous phase in the suitable calibration curve (concentration range from 1.2 to 0.05 mg/mL,  $r^2 > 0.986$ ). The concentration in the organic phase was calculated as the difference between the concentration in the aqueous phase at the starting condition and after phase separation. Octanol-water partition coefficient was estimated as the common

logarithm of the slope of the plot of the concentration of CDs in the octanol phase against the corresponding equilibrium aqueous phase.

#### **Formation of inclusion complexes with camptothecin (CPT)**

*Protocol A:* a volume of 3 mL of a 0.5 mg/mL solution of CPT in  $\text{Cl}_3\text{CH}$  was combined with 3 mL of a 1mg/mL solution of the sodium salt of LCDs in water. The resulting two phases mixture was shaken at room temperature protected from light for 48 h. Afterwards phase separation was allowed to proceed and the remaining concentrations of CPT in the organic phase was estimated from interpolation of the fluorescence at 425 nm (Ex 365 nm) in a calibration curve.<sup>1</sup> The amount of CPT entrapped by the sodium salt of LCDs in the aqueous phase was estimated as the difference between the 0.5 mg/mL solution of CPT and the concentration of CPT in the organic phase. Results were further confirmed by determining the concentration of CPT in the organic phase resulting from the acidification of the aqueous phase with 5% HCl to yield the protonated form of LCDs (i.e. soluble in the organic phase) and extraction with  $\text{Cl}_3\text{CH}$  (3 mL).

*Protocol B:* a volume of 3 mL of a 0.5 mg/mL solution of CPT in  $\text{Cl}_3\text{CH}$  was combined with 3 mL of a 1 mg/mL solution of the sodium salt of LCDs in water. The mixture was rotavaporated to remove the organic solvent and force the entrapment of CPT. Then the aqueous phase was acidified with 5% HCl to yield the protonated form of LCDs and extracted with  $\text{Cl}_3\text{CH}$  (3 mL). The concentrations of CPT was estimated from interpolation of the fluorescence of the organic phase at 425 nm (Ex 365 nm) in a calibration curve.

#### **Formation of the inclusion complex with IR780**

*Protocol A:* a volume of 3 mL of a 0.5 mg/mL solution of IR780 in  $\text{Cl}_3\text{CH}$  was combined with 3 mL of **LCD-2** in  $\text{Cl}_3\text{CH}$  (img/mL) and shaken overnight at room temperature protected from light. After extraction with a saturated solution of  $\text{HCO}_3\text{Na}$  (3 x 6 mL) the aqueous phases were pooled and treated with 5% HCl to correct pH to 2 (to yield the protonated form of LCDs) and then extracted with  $\text{Cl}_3\text{CH}$  (2 x 10 mL). The concentration of LCDs and NIR were estimated from the interpolation of the absorbance at both 250 nm and 326 nm for the LCD and 792 nm for IR780 in the suitable calibration curves in  $\text{Cl}_3\text{CH}$ .

*Protocol B:* a volume of 3 mL of a 0.5 mg/mL solution of IR780 in  $\text{Cl}_3\text{CH}$  was combined with 3 mL of LCD-2Na in  $\text{H}_2\text{O}$  and shaken overnight at room temperature protected from light. Then pH was corrected to 9 by addition of 10%  $\text{Na}_2\text{CO}_3$  and the organic phase was discarded. The aqueous phase was acidified to pH 2 and extracted with  $\text{Cl}_3\text{CH}$  (2 x 10 mL). The concentration of LCDs and NIR were estimated as above.

---

<sup>1</sup> Joykrishna Dey and Isiah M. Warner, "Spectroscopic and Photophysical Studies of the Anticancer Drug: Camptothecin," *Journal of Luminescence* 71, no. 2 (March 1997): 105–14, doi:10.1016/S0022-2313(96)00125-1.

### **Cell viability using Flow cytometry<sup>2</sup>**

G361 cells were incubated for 24 h with suitable amounts of either **LCD-2Na@CPT** or free CPT to yield final CPT concentrations up to 100 µg/mL. Then, cells were washed two times with phosphate saline buffer (PBS), trypsinized and pelleted. The pellet was washed two more times with PBS and re-suspended in PBS to yield 10<sup>6</sup> cells/mL. A volume of 200 µL of cells were incubated at room temperature with fluorescein diacetate (100 ng/mL, 20 µL) and propidium iodide (100 µg/mL, 20 µL) for 10 min and then analyzed by recording forward and orthogonal light scatter, red (>630 nm) and green (520 nm) fluorescence.

Propidium iodide is excluded by viable cells, but it binds to nucleic acids in dead or dying cells, fluorescing red. Fluorescein diacetate is uptaken by cells and retained by those with intact plasma membrane. It is not fluorescent and by action of the intracellular esterases it is converted to fluorescein. Hence, viable cells fluoresce green.

### **Electrophoretic mobility and Z-potential determination**

The different degree of hydrophobicity of the CDs could affect their electrical surface charge. In addition, one of the proposed applications is drug delivery, so the determination of the zeta potential of the carbon dots, and the effect of pH in the physiological range (pH 7-7.4) and close to cancer tissue values (pH 6.5) on this quantity, appeared also as an important characterization of the synthesized CDs. For that aim, we measured the electrophoretic mobility of the dots in PBS buffers at pH 6.5, 7.04, and 7.4. A Zetasizer Nano-ZS instrument (Malvern instruments, U.K.) was used, determining the mobilities of the three types of CDs in triplicate, with nine determinations in each sample. The zeta potential of the particles was calculated using the Henry formula<sup>3</sup>.

---

<sup>2</sup> K H Jones and J A Senft, "An Improved Method to Determine Cell Viability by Simultaneous Staining with Fluorescein Diacetate-Propidium Iodide.," *Journal of Histochemistry & Cytochemistry* 33, no. 1 (January 1985): 77–79, doi:10.1177/33.1.2578146.

<sup>3</sup> H. Ohshima in *Electrical Phenomena at Interfaces: Fundamentals: Measurements, and Applications*, H. Ohshima, K. Furusawa (Eds.), Marcel Dekker Inc. N. York, 2<sup>nd</sup> edition, 1998 Chapter2, 19-56

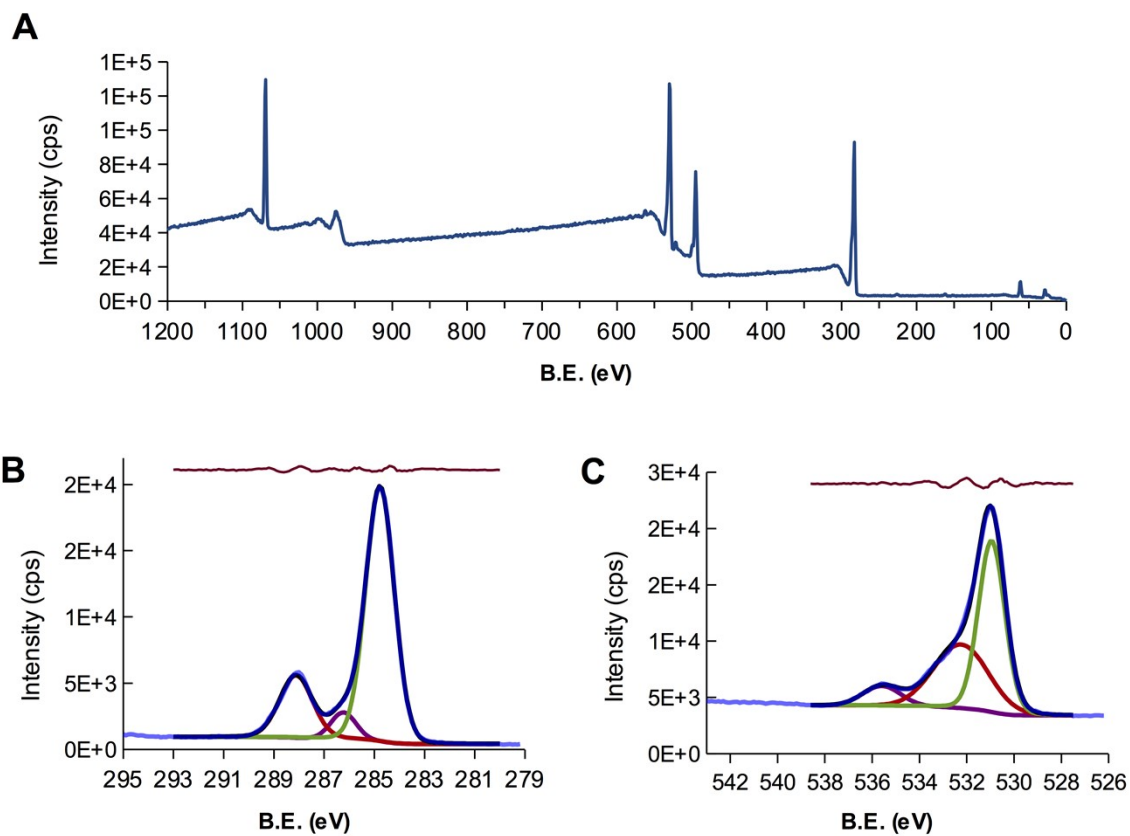

**Fig. S1.-** XPS survey spectrum (**A**) and high-resolution XPS spectra of C1s (**B**) and O1s (**C**) of the **CD-1Na** obtained by thermolysis of CA in DMSO after treatment with a solution of NaOH, dialysis and lyophilization. Experimental data are shown in light blue, envelope in black and residuals on top in brown

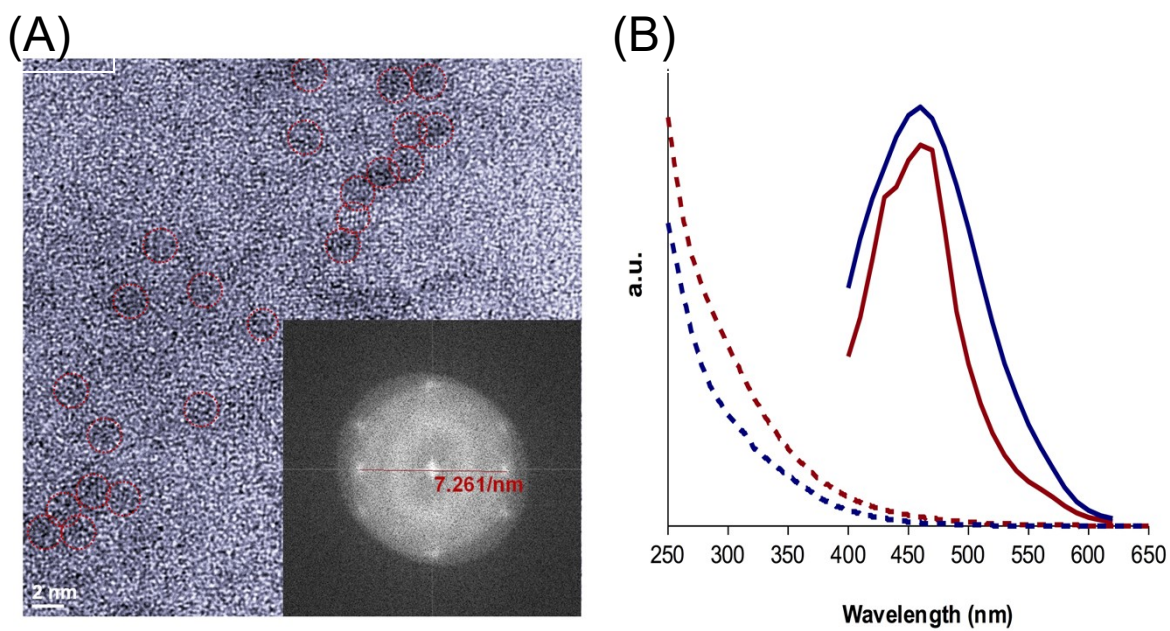

**Fig. S2.-** (A) HRTEM image of **CD-1Na** showing the estimation of the interplanar spacing. (B) Uv-Vis absorption (dash lines) and photoluminescence emission (excitation at 326 nm) spectra of **CD-1Na** (red) and **CDs** obtained by solvent free thermolysis of CA (blue).

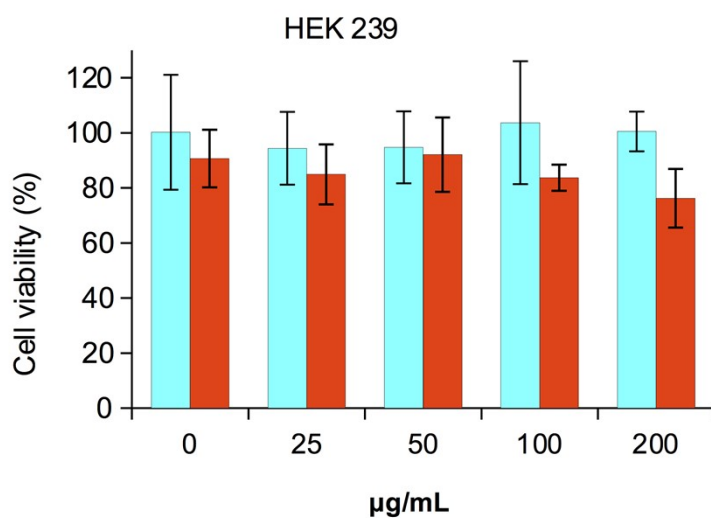

**Fig. S3.-** (A) Cytotoxicity assay on HEK 239 cells of **LCD-1Na** (cyan) and **LCD-2Na** (orange). Cell lines were incubated for 24 h and cytotoxicity was assayed by the MTT method. Results are means  $\pm$  1 standard deviation.



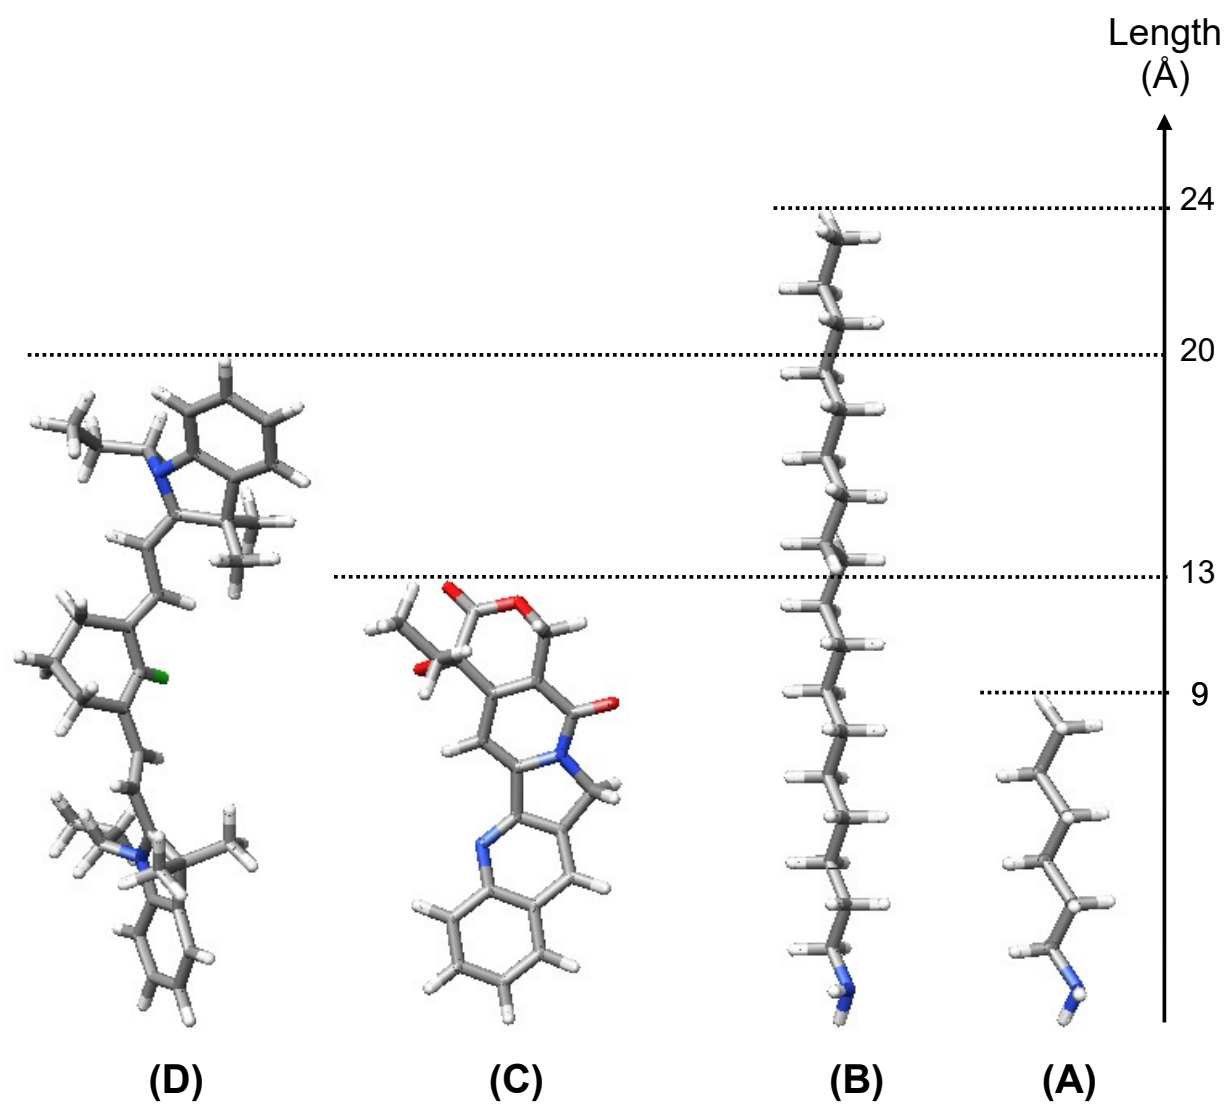

**Fig. S4.**- Length of the alkyl chain of **LCD-1** (A) and **LCD-2** (B), of **CPT** (C) and of **IR-780** (D).

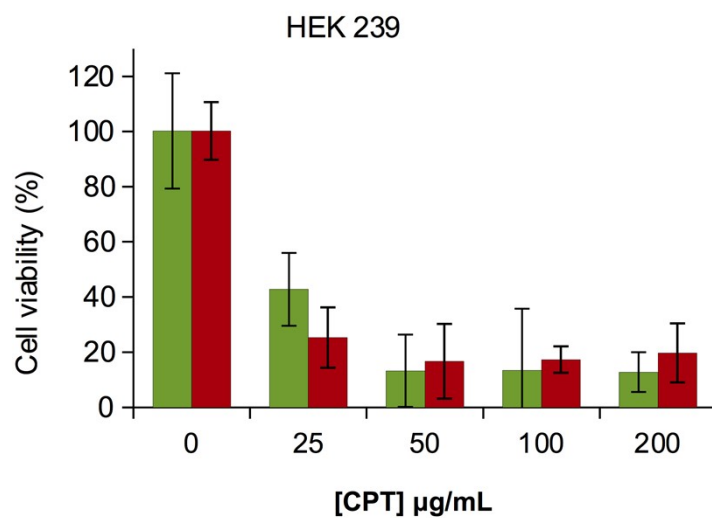

**Fig. S5. Cytotoxicity of LCD-2Na@CPT (green) and free CPT (red) against the cell line HEK 239.** For **LCD-2Na@CPT** values correspond to the load of CPT. Cell lines were incubated for 24 h with suitable amounts of either free CPT or **LCD-2Na@CPT** and cytotoxicity was assayed by the MTT method. Results are means  $\pm$  1 standard deviation. IC<sub>50</sub> value was 78  $\mu\text{M}$  for free CPT and 66  $\mu\text{M}$  for **LCD-2Na@CPT**

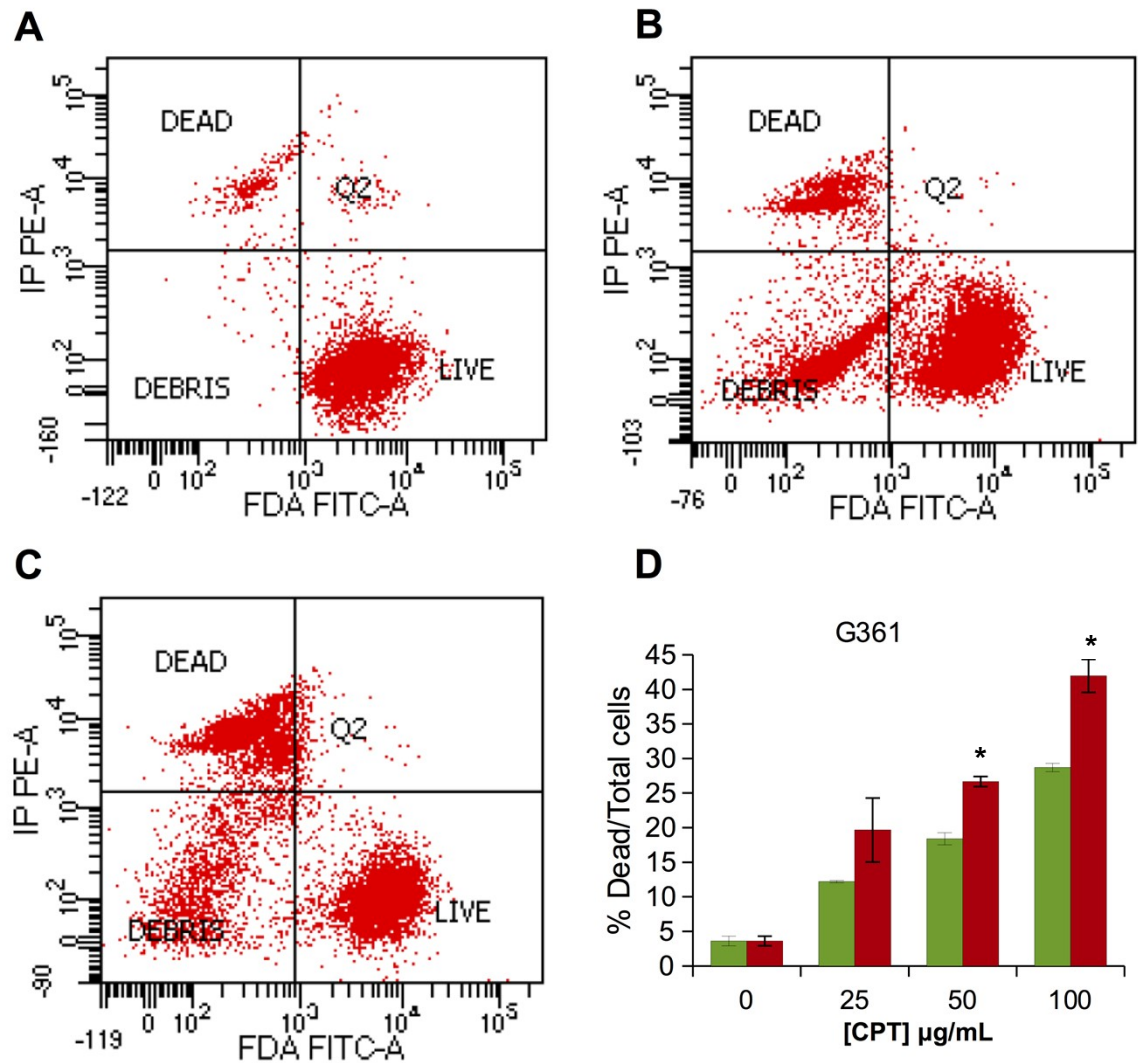

**Fig. S6. Flow cytometry analysis of LCD-2Na@CPT and CPT against the cell line G361.** (A-C) Flow cytometric differentiation of fluorescein diacetate and propidium iodide stained cells (example for a FACS sorted sample) for control cells (A) and cells incubated with 100 µM of either **LCD-2Na@CPT** (B) or CPT (C). (D) Percentage of Dead/total cells after the incubation with free CPT (red) or **LCND-2Na@CPT** (green). \* p<0.05 vs CPT incubated cells.

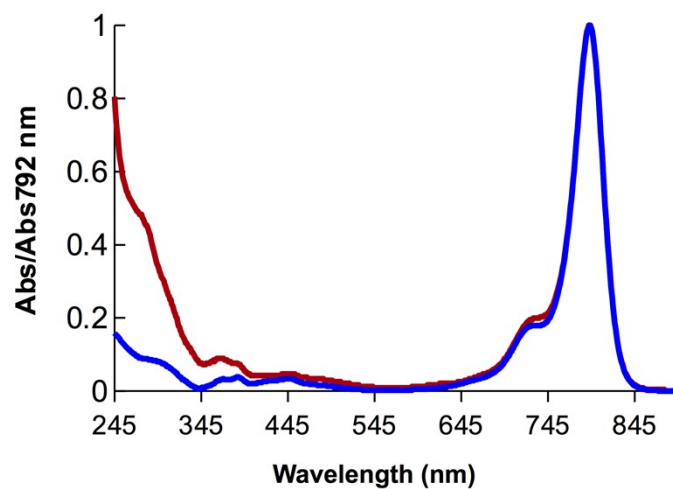

**Fig. S7-** UV-vis spectra of **LCD-2Na@IR780** normalized by the absorption at 792 nm (absorbance of IR780) from the complex obtained by two alternative procedures: i) combination of an aqueous phase containing **LCD-2Na** with an organic phase with IR780 (red) or ii) both **LCD-2** and IR780 in the organic phase (blue). The lower relative absorbance in the UV region (absorbance of LCDs) for the second approach (blue spectrum) indicates that the load of IR780 is higher.

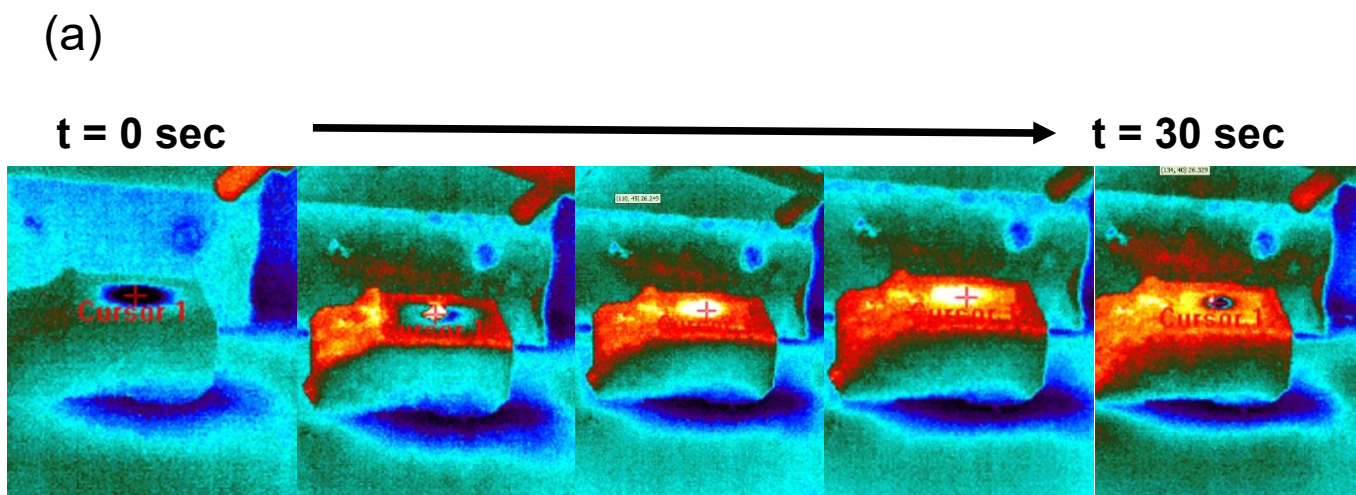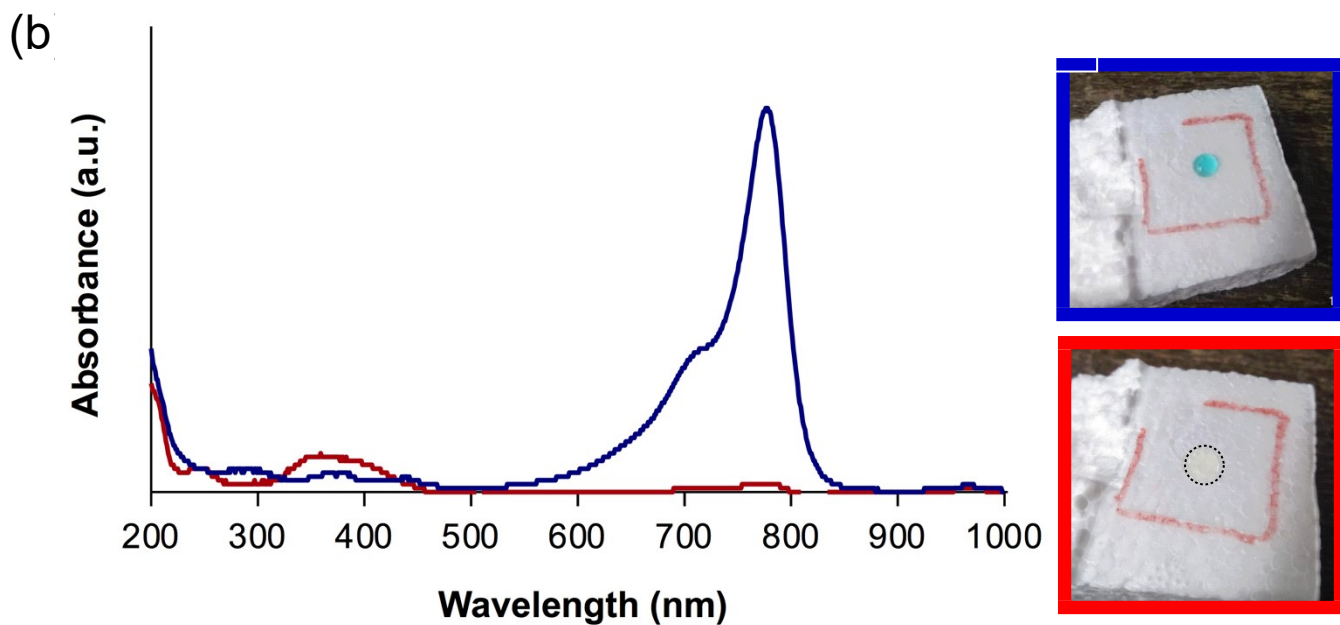

**Fig. S8.-** Irradiation of a 10  $\mu\text{L}$  drop of a 13 nM solution of IR783 with with a 808 nm NIR laser at a power of 1.2  $\text{W}/\text{cm}^2$ . **(A)** Thermal images of the drop along the first 30 second or irradiation. **(B)** UV-Vis spectra of the drop at the beginning (blue) and end (red) of the experiment. **(C)** Image of the drop at the beginning (blue frame) and end (red frame) of the experiment.

**Table S1.-** Quantification (%atomic concentration) by XPS of the most significant peaks detected in **CD-1Na**, the hydrophobic CDs **LCD-1**, **LCD-2** and their

hydrosoluble sodium salt **LCD-1Na** and **LCD-2Na**.

| <b>Sample</b>  | <b>C1s</b> | <b>O1s</b> | <b>S2p</b> | <b>N1s</b> | <b>Na1s</b> | <b>O1s/C1s ratio</b> | <b>N1s/C1s ratio</b> |
|----------------|------------|------------|------------|------------|-------------|----------------------|----------------------|
| <b>CD-1Na</b>  | 64.75      | 26.70      | 0.31       | —          | 8.24        | 0.412                | —                    |
| <b>LCD-1</b>   | 77.16      | 21.26      | 0.65       | 0.82       | —           | 0.275                | 0.011                |
| <b>LCD-2</b>   | 76.26      | 22.28      | 0.38       | 1.08       | —           | 0.292                | 0.014                |
| <b>LCD-1Na</b> | 68.83      | 24.00      | 0.28       | 1.10       | 5.78        | 0.349                | 0.016                |
| <b>LCD-2Na</b> | 84.59      | 11.83      | 0.12       | 2.08       | 1.46        | 0.140                | 0.024                |

**Table S2.-** Fluorescent quantum yield (FLQY) of the hydrosoluble sodium salts of the CDots obtained in DMSO using as standard (QY=0.04) the sodium salt of AA-CD obtained from the free solvent pyrolysis of CA<sup>4</sup>.

| <b>Sample</b>  | <b>FLQY (%)</b> |
|----------------|-----------------|
| <b>CD-1Na</b>  | 4.1             |
| <b>LCD-1Na</b> | 4.6             |
| <b>LCD-2Na</b> | 3.1             |

<sup>4</sup> Mariano Ortega-Muñoz et al., "Acid Anhydride Coated Carbon Nanodots: Activated Platforms for Engineering Clicked (Bio)nanoconstructs," *Nanoscale* 11, no. 16 (2019): 7850–56, doi:10.1039/C8NR09459D.

**Table 3.-** Electrophoretic mobility and Z-potential pf CD-1Na, LCD-1Na and LCD-2Na at three different pH values

| <b>Sample</b>  | <b>pH</b> | <b>Mobility</b>  | <b>Z-potential (eV)</b> |
|----------------|-----------|------------------|-------------------------|
| <b>CD-1Na</b>  | 6.50      | $-0.75 \pm 0.14$ | $-14.0 \pm 3$           |
|                | 7.04      | $-0.66 \pm 0.09$ | $-12.1 \pm 1.6$         |
|                | 7.40      | $0.58 \pm 0.06$  | $-10.6 \pm 1.1$         |
| <b>LCD-1Na</b> | 6.50      | $-3.66 \pm 0.20$ | $-67 \pm 4$             |
|                | 7.04      | $-3.30 \pm 0.23$ | $-60 \pm 4$             |
|                | 7.40      | $-3.33 \pm 0.12$ | $-61.2 \pm 2.2$         |
| <b>LCD-2Na</b> | 6.50      | $-3.75 \pm 0.24$ | $-69 \pm 4$             |
|                | 7.04      | $-3.72 \pm 0.17$ | $-68 \pm 3$             |
|                | 7.40      | $-3.73 \pm 0.17$ | $-69 \pm 3$             |
